# Supplementary material
Source: HighWire-hosted journal article supplement (http://erj.ersjournals.com/highwire/filestream/131547/field_highwire_adjunct_files/3/ERJ-00699-2016_Appendix_4.pdf)
Supplement: ERJ-00699-2016_Appendix_4.pdf [file ERJ-00699-2016_Appendix_4.pdf]

#### Appendix 4 Characteristics of studies

| First author, Publication year, Follow-up time | Study design | Characteristics of patients: analyzed/recruited (n), (women %), mean age (years) | Atopy or allergy <sup>1,2,3)</sup> | Asthma severity | Baseline FEV1, % pred (deviation) | Exhalation flow rate in FeNO measurement (ml/s) | Baseline FeNO ppb mean (deviation) | Was inflammatory phenotype assessed? | Was predictive ability of FeNO assessed in relation to inflammatory phenotype? | Funding and support |
|------------------------------------------------|--------------|----------------------------------------------------------------------------------|------------------------------------|-----------------|-----------------------------------|-------------------------------------------------|------------------------------------|--------------------------------------|--------------------------------------------------------------------------------|---------------------|
|------------------------------------------------|--------------|----------------------------------------------------------------------------------|------------------------------------|-----------------|-----------------------------------|-------------------------------------------------|------------------------------------|--------------------------------------|--------------------------------------------------------------------------------|---------------------|

#### Study question 1: Does increased FeNO predict a favourable response to ICS in steroid-naïve asthmatics?

|                                                    |                                                                                                                                                |                                                               |                         |                  |                  |                         |                                                                                  |                                                                                                                                                             |     |                                                                                        |
|----------------------------------------------------|------------------------------------------------------------------------------------------------------------------------------------------------|---------------------------------------------------------------|-------------------------|------------------|------------------|-------------------------|----------------------------------------------------------------------------------|-------------------------------------------------------------------------------------------------------------------------------------------------------------|-----|----------------------------------------------------------------------------------------|
| <b>Cowan 2010</b><br>Follow-up: at minimum 28 days | Prospective cohort related to FeNO (steroid response was compared in eosinophilic asthma (EA) vs. non-eosinophilic asthma (NEA))               | n=88/94 (EA: 69 %; NEA: 31 %), women 64 %.<br>Age: 43 (SD 13) | EA: 77 %; NEA: 86 %     | not detailed     | 88 (SD 16)       | 50                      | EA: geometric mean 29.6 (95 % CI 24.7 to 35.6); NEA: 24.1 (95 % CI 18.9 to 30.7) | Yes. 65 (69 %) of the subjects had sputum eosinophils $\geq$ 2 % (eosinophilic asthma) and 29 (31 %) had sputum eosinophils < 2 % (noneosinophilic asthma). | Yes | Lottery Health New Zealand                                                             |
| <b>Szeffler 2002</b><br>Follow-up: 24 weeks        | Prospective cohort related to FeNO (randomized to two ICS intervention groups which were combined in the analysis of this review)              | n=21/30 (women 23 %).<br>Age: 30 (SD 7.5)                     | no information provided | not detailed     | 74.2 (SD 11.1)   | no information provided | 19.3 (SD 11)                                                                     | Group median values for sputum eosinophils and neutrophils are given, but individuals were not categorised into different inflammatory phenotypes.          | No  | National and academic organisations                                                    |
| <b>Szeffler 2005</b><br>Follow-up: 8 week          | Prospective cohort related to FeNO (randomized crossover trial related to medication (ICS vs. LTRA); in this review considered only ICS -data) | n=111/144 (girls 41%).<br>Age: 11 (SD 3.4)                    | 2.8 <sup>1)</sup>       | mild-to-moderate | 95 ( $\pm$ 12.9) | 50                      | 39.5 (95 % CI 34.2 to 44.7)                                                      | Group median values for blood eosinophil count and serum ECP level are given, but individuals were not categorised into different inflammatory phenotypes.  | No  | National and academic organisations. Equipment support by Aerocrine, Inc. Chicago, 111 |

#### Study question 2: Does increased FeNO predict risk of exacerbation in asthmatic patients on regular stable ICS treatment?

|                                          |                                                                                                                                                            |                                                                                                                   |                         |                                         |                                                                         |     |                                                                  |                                                                                                                                                                                       |    |                                                                                                                                                           |
|------------------------------------------|------------------------------------------------------------------------------------------------------------------------------------------------------------|-------------------------------------------------------------------------------------------------------------------|-------------------------|-----------------------------------------|-------------------------------------------------------------------------|-----|------------------------------------------------------------------|---------------------------------------------------------------------------------------------------------------------------------------------------------------------------------------|----|-----------------------------------------------------------------------------------------------------------------------------------------------------------|
| <b>Gelb 2006</b><br>Follow-up: 1.5 years | Prospective cohort related to FeNO                                                                                                                         | n= 44/44 (women 55 %).<br>Age: 48.5                                                                               | no information provided | mild-to-severe                          | 69 ( $\pm$ 14)*; 72( $\pm$ 25)**                                        | 100 | 9 $\pm$ 5*; 35 $\pm$ 14**                                        | No                                                                                                                                                                                    | No | No information provided. Authors were from independent organisations                                                                                      |
| <b>Kupczyk 2014</b><br>Follow-up: 1 year | Prospective cohort related to FeNO                                                                                                                         | In total 169 patients: 93 with severe and 76 with mild-to-moderate asthma (women 59%).<br>Age: 46.5 (range 18-72) | 45%                     | Subgroups: mild-to-moderate, and severe | severe asthma 70.4 $\pm$ 2.1;<br>mild-to-moderate asthma 88.7 $\pm$ 2.1 | 50  | severe asthma 46.3 $\pm$ 6.2;<br>mild-to-moderate 40.1 $\pm$ 4.1 | Group means for sputum eosinophils and neutrophils are given and in the subgroup of frequent exacerbators it is stated that 83.3 % of subjects had high levels of sputum eosinophils. | No | the European Union and several national funding bodies. Unconditional support from Aerocrine AB                                                           |
| <b>Ozier 2011</b>                        | Prospective cohort of adults. Baseline characteristics not reported for those 55 patients with controlled asthma (the subgroup considered in this review). |                                                                                                                   |                         |                                         |                                                                         | 50  |                                                                  | No                                                                                                                                                                                    | No | Phadia provided the MINO analyser, but did not participate in the collection, analysis and interpretation of the data or in the writing of the manuscript |

**Study question 3: Does increased FeNO in asthmatic patients on regular stable ICS treatment predict further benefit from augmenting the glucocorticoid treatment?**

|                                                                      |                                                                                                                                                  |                                                                                                                     |                         |                                         |                                                                       |                         |                                                                                     |                                                                                                                                                                             |    |                                                                                                 |
|----------------------------------------------------------------------|--------------------------------------------------------------------------------------------------------------------------------------------------|---------------------------------------------------------------------------------------------------------------------|-------------------------|-----------------------------------------|-----------------------------------------------------------------------|-------------------------|-------------------------------------------------------------------------------------|-----------------------------------------------------------------------------------------------------------------------------------------------------------------------------|----|-------------------------------------------------------------------------------------------------|
| <b>Kupczyk 2013</b><br>Follow-up: likely 2 weeks but remains unclear | Prospective cohort related to FeNO (placebo-controlled trial related to medication; half of the patients in blinded design, half in open design) | In total 146 patients: 84 with severe and 62 with mild-to-moderate asthma (women 57.5%).<br>Age: 47.5 (range 18-72) | 40.4%                   | Subgroups: mild-to-moderate, and severe | severe asthma 73.2 $\pm$ 2.3 ; mild or moderate asthma 89.9 $\pm$ 2.5 | 50                      | severe asthma 46.9 $\pm$ 6.6 ;<br>mild-to-moderate asthma 39.3 $\pm$ 4.4            | Group mean values for sputum eosinophils and neutrophils and blood eosinophil count are given, but individuals were not categorised into different inflammatory phenotypes. | No | the European Union and several national funding bodies. Unconditional support from Aerocrine AB |
| <b>Little 2000</b><br>Follow-up: 2 weeks                             | Prospective cohort related to FeNO                                                                                                               | n=37/37(women 51 %).<br>Age: 48.6 (SD 12.2)                                                                         | no information provided | not detailed                            | 76.3 (SD 21.9)                                                        | no information provided | Baseline FeNO > 10 ppb in 32% of patients (cut-off value for increased FeNO 10 ppb) | 11 out of 30 subjects had sputum eosinophilia $\geq$ 4 % and 19 subjects had sputum eosinophils < 4 %.                                                                      | No | National Asthma Campaign                                                                        |

|                                                         |                                    |                                                                                                                                                   |                      |                     |                                                      |    |                                                                                                         |    |    |                                                                |
|---------------------------------------------------------|------------------------------------|---------------------------------------------------------------------------------------------------------------------------------------------------|----------------------|---------------------|------------------------------------------------------|----|---------------------------------------------------------------------------------------------------------|----|----|----------------------------------------------------------------|
| <b>Michils 2008</b><br>Follow-up: not reported          | Prospective cohort related to FeNO | In this review, considered only those 82 patients whose ICS dose was over 500 µg/day equ BDP.<br>Age: no information provided but adults however. | 88 % <sup>2)</sup>   | uncontrolled asthma | 84.1 ± 19.0 (patients with over 500 µg/day equ BDP). | 50 | Geometric mean 20.5 (geometrical interval 9.0 - 46.7) (patients with ICS dose over 500 µg/day equ BDP). | No | No | No information provided. Authors were from university hospital |
| <b>Perez-de-Llano 2010</b><br>Follow-up: 1 and 2 months | Prospective cohort related to FeNO | n=102/102 (women 72 %).<br>Age: 56 ± 15                                                                                                           | 46.5 % <sup>2)</sup> | uncontrolled asthma | 72 ± 24                                              | 50 | 43.1 ± 45.6 (range 4-222)                                                                               | No | No | No information provided. Authors were from hospitals           |

**Study questions 4: If an asthmatic patient on low dose ICS has good asthma control for at least 3 months, does low baseline FeNO predict successful withdrawal of ICS without asthma relapse?**  
**Study questions 5: If an asthmatic patient on low dose ICS has good asthma control for at least 3 months and the ICS is withdrawn, does increased FeNO level during the follow-up predict asthma relapse?**

|                                                            |                                    |                                               |                    |              |                     |    |                                                                                                                            |    |    |                                                         |
|------------------------------------------------------------|------------------------------------|-----------------------------------------------|--------------------|--------------|---------------------|----|----------------------------------------------------------------------------------------------------------------------------|----|----|---------------------------------------------------------|
| <b>Pijnenburg 2005</b><br>Follow-up: 2, 4, 12 and 24 weeks | Prospective cohort related to FeNO | n=37/40 (girls 43 %).<br>Age: 12 (range 7–17) | 78%                | not detailed | 99.5 (range 73–134) | 50 | Children with asthma relapse: geometric mean 14.8 (95% CI 8.5 to 25.8); children without asthma relapse: 10.5 (95% CI 7.3) | No | No | Funding provided by independent foundation organisation |
| <b>Ferrer 2011</b><br>Follow-up: 6 months                  | Prospective cohort related to FeNO | n=28/28 (girls 25 %).<br>Age: 11 (range 6–14) | 93 % <sup>3)</sup> | not detailed | > 80                | 50 | median 48 (range 12–144)                                                                                                   | No | No | No information provided.                                |

<sup>1)</sup> number of positive skin tests out of 8 allergens tested

<sup>2)</sup> positive skin test, (%)

<sup>3)</sup> subjects of allergen immunotherapy, (%)

\*FeNO ≤ 22

\*\*FeNO > 22

SD = standard deviation

CI = confidence interval
